# Supplementary material for: Magnetic molecularly imprinted polymers as a fluorescent sensor for selective detection of Sudan I in chili powder
Source: Royal Society of Chemistry journal article supplement (doi:10.1039/d3ay00591g), 2023-01-01
Supplement: d3ay00591g1.pdf [file d3ay00591g1.pdf]

## Supporting Information

### Magnetic molecularly imprinted polymers as a fluorescent sensor for selective detection of Sudan I in chili powder

Rui Xu,<sup>‡a</sup> Jiasheng Lin,<sup>‡ac</sup> Yanjie Wang,<sup>a</sup> Yahan Cui,<sup>a</sup> Lan Ding<sup>a</sup> and Yanhua  
Chen<sup>\*ab</sup>

<sup>a</sup> College of Chemistry, Jilin University, 2699 Qianjin Street, Changchun 130012,  
China

<sup>b</sup> Jilin Province Research Center for Engineering and Technology of Spectral  
Analytical Instruments, Jilin University, 2699 Qianjin Street, Changchun 130012,  
China

<sup>c</sup> Zhengzhou Institute of Biomedical Engineering and Technology, Zhengzhou,  
Henan 450001, China

<sup>‡</sup> These authors contributed equally to this work.

E-mail address: [chenyanhua@jlu.edu.cn](mailto:chenyanhua@jlu.edu.cn) (Yanhua Chen)

## Experimental

## Materials

25 Ethylene glycol, sodium hydroxide (NaOH), acetic acid, glucose, sucrose,  
26 lactose, urea, citric acid, sodium citrate, sodium citrate, sodium acetate, ferrous  
27 chloride ( $\text{FeCl}_2 \cdot 4\text{H}_2\text{O}$ ) and other metallic salt ions were obtained from Beijing  
28 Chemical Works (Beijing, China). Ferric trichloride ( $\text{FeCl}_3 \cdot 6\text{H}_2\text{O}$ ), ammonia, ethyl  
29 alcohol, Sudan I, Sudan II, Sudan B, Sudan G, azophloxine, orange II, L-tryptophan,  
30 L-cysteine, isoleucine (Ile), methionine (Met), threonine (Thr), phenylalanine (Phe),  
31 valine (Val), and histidine (His) were obtained from Sinopharm Group Co. Ltd.  
32 (Shanghai, China). Mmethyl alcohol, ascorbic acid, sodium chloride (NaCl),  
33 potassium chloride (KCl), and tetraethoxysilane (TEOS, 40%) were purchased from  
34 Tianjin Guangfu Institute of Fine Chemicals (Tianjin, China). 3-aminopropyl  
35 triethoxysilane (APTES, 98%) was purchased from Shanghai McLean Biochemical  
36 Technology Co. Ltd (Shanghai, China). All the other reagents in the present work  
37 were analytical reagent without any purification. Deionized water used throughout the  
38 experiments was acquired by the laboratory purification system.

### 39 Instruments

40 The morphology and microstructure of  $\text{CDs@SiO}_2$  were characterized by  
41 JEM-2100 Field-emission transmission electron microscope (TEM, JEOL, Japan).  
42 The morphologies of MMIPs and MNIPs were characterized by SU8020 Field-  
43 emission scanning electron microscope (SEM, Hitachi, Japan). Elemental analysis  
44 was investigated by energy dispersive X-ray spectroscopy (EDS, Thermo, USA). X-  
45 ray diffraction (XRD) measurements were performed using an Empyrean X-ray  
46 diffractometer equipped with a  $\text{Cu K}\alpha$  radiation source (PANalytical B.V.,

47 Netherlands). Fourier-transform infrared spectroscopies (FT-IR) were recorded on a  
48 Nicolet-iS5 FT-IR spectrophotometer (Thermo, USA) with KBr pellets. The water  
49 contact angle was measured using a droplet angle measuring instrument  
50 (Changchun, Jilin). Thermal gravimetric analysis (TGA) was carried out with a TGA  
51 Q500 thermal analyzer instrument (TA, USA). X-ray photoelectron spectroscopy  
52 (XPS) was performed on an ESCALAB 250 electron spectrometer (Thermo Electron,  
53 USA). The magnetic hysteresis loops of samples were measured using a SQUID-VSM  
54 Magnetic Property Measurement System (Quantum Design, USA). Ultraviolet-visible  
55 (UV-Vis) absorption spectroscopies were collected on a Shimadzu UV-2550  
56 spectrophotometer (Shimadzu, Japan). Fluorescence spectra were performed on an  
57 F-2700 fluorescence spectrophotometer (Hitachi, Japan). Nanosecond fluorescence  
58 lifetime was investigated by FLS 920 fluorescence spectrophotometer (Edinburgh,  
59 UK).

60

## 61 **Results and discussion**

### 62 **Characterization of MMIPs**

63 The elemental analysis of MMIPs was investigated through EDS mapping (**Fig.**  
64 **S1**). The results revealed the presence of C, N, O, Si and Fe elements in the MMIPs  
65 composites.

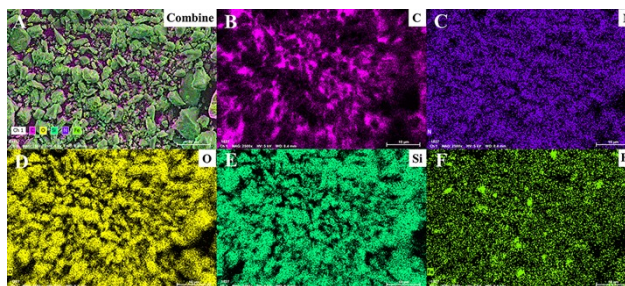

66

67 **Fig. S1** Elemental mapping images of Combine, C, N, O, Si and Fe of MMIPs (A–F,  
68 respectively)

69 The hydrophilic properties of MMIPs and MNIPs were investigated by water  
70 contact angle test, and the corresponding results were shown in **Fig. S2**. The water  
71 contact angles of MMIPs and MNIPs are  $12.53^\circ$  and  $14.50^\circ$  respectively, indicating  
72 that the prepared MMIPs exhibited good hydrophilicity.

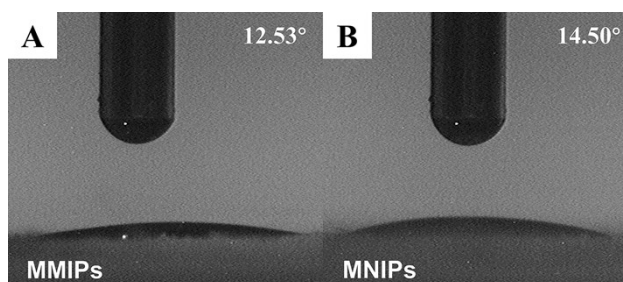

73

74 **Fig. S2** Water contact angle test of MMIPs (A) and MNIPs (B)

75

## 76 Calculation of fluorescence lifetime

77 When a substance molecule is excited by the exciting light, it absorbs energy and  
78 transitions from the ground state to the excited state, and then emits fluorescence in  
79 the form of a radiation transition and returns to the ground state. The time required for  
80 the fluorescence intensity to decay to  $1/e$  of the initial intensity is the fluorescence  
81 lifetime of the fluorescent substance under the measurement conditions.<sup>1</sup> **Fig. S3**  
82 showed the fluorescence decay curves of MMIPs in the presence and absence of

83 Sudan I, and the fluorescence lifetime of MMIPs gradually decreased from 6.69 ns to  
 84 5.69 ns with the increase of Sudan I concentration. Combined with previously  
 85 reported literatures,<sup>1-4</sup> it was further confirmed that the fluorescence lifetime of donor  
 86 NS-CDs decreased after the addition of acceptor Sudan I.

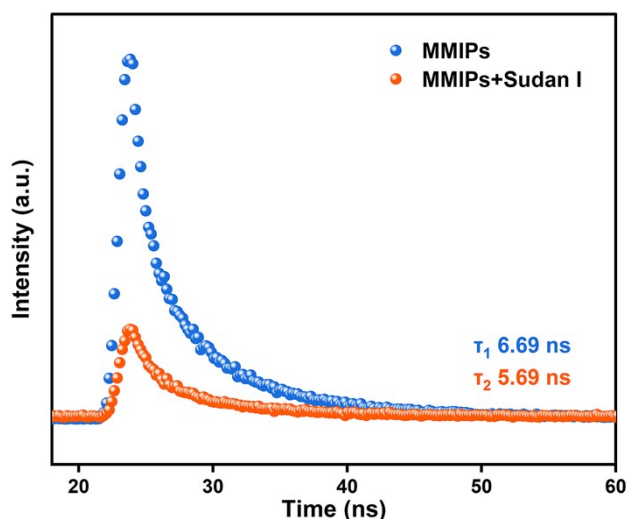

87  
 88 **Fig. S3** Fluorescence decay curves of MMIPs in the absence and presence of Sudan I

### 90 Different fluorescence methods for detection of Sudan I

91 In **Table S1**, the fluorescence detection methods of Sudan I was summarized,  
 92 including the linear range and limit of detection (LOD) of the methods.

93 **Table S1** Comparison of different fluorescence detection methods of Sudan I with  
 94 this work

| Method                           | Linear range ( $\mu\text{M}$ ) | LOD ( $\mu\text{M}$ ) | Ref. |
|----------------------------------|--------------------------------|-----------------------|------|
| Mn-ZnS quantum dots              | 0.68–7.41                      | 0.10                  | 6    |
| carbon quantum dots              | 2.40–104.0                     | 0.95                  | 7    |
| CsPbBr <sub>3</sub> quantum dots | 0.40–40.28                     | 0.013                 | 8    |

|                           |            |       |           |
|---------------------------|------------|-------|-----------|
| tire-derived carbon dots  | 0.5–60     | 0.17  | 9         |
| N, P co-doped carbon dots | 0.043–52.0 | 0.043 | 10        |
| MMIPs                     | 1–40       | 0.38  | This work |

---

95

## 96 References

- 97 1. Z. M. S. H. Khan, S. Saifi, Shumaila, Z. Aslam, S. A. Khan, M. Zulfequar, *J*  
98 *Photochem Photobiol, A*, 2020, **388**, 112201.
- 99 2. Q. Wang, L. Li, X. Wang, C. Dong, S. Shuang, *Talanta*, 2020, **219**, 121180.
- 100 3. Y. Shi, Y. Sun, X. Qu, L. Zhou, T. Yue, Y. Yuan, *Food Chem*, 2021, **347**, 129069.
- 101 4. S. Feng, F. Pei, Y. Wu, J. Lv, Q. Hao, T. Yang, et al., *Spectrochim Acta A Mol*  
102 *Biomol Spectrosc*, 2021, **246**, 119004.
- 103 5. A. A. Ensafi, M. Zakery, B. Rezaei, *Spectrochim Acta A Mol Biomol Spectrosc*,  
104 2019, **206**, 460-465.
- 105 6. M. Zhou, X. Chen, Y. Xu, J. Qu, L. Jiao, H. Zhang, et al., *Dyes Pigm*, 2013, **99**,  
106 120-126.
- 107 7. S. Anmei, Z. Qingmei, C. Yuye, W. Yilin, *Anal Chim Acta*, 2018, **1023**, 115-120.
- 108 8. C. Wu, Q. Lu, X. Miu, A. Fang, H. Li, Y. Zhang, *J Food Sci Technol*, 2018, **55**,  
109 2497-2503.
- 110 9. Y. Hu, Z. Gao, *Spectrochim Acta A Mol Biomol Spectrosc*, 2020, **239**, 118514.
- 111 10. D. Zhao, Z. Zhang, X. Liu, R. Zhang, X. Xiao, *Mater Sci Eng, C*, 2021, **119**,  
112 111468.

113
